# Supplementary material
Source: PubMed Central journal article supplement (PMC3703824)
Supplement: NIHMS477621-supplement-1.pdf [file NIHMS477621-supplement-1.pdf]

## ***Supplementary Information***

### **Title:**

# **Histone deacetylase inhibitors facilitate partner preference formation in female prairie voles**

Hui Wang<sup>\*,1,2,3</sup> Florian Duclot<sup>\*,1,2</sup> Yan Liu,<sup>2,3</sup> Zuoxin Wang<sup>2,3,#</sup> and Mohamed Kabbaj<sup>1,2,#</sup>

*\* These authors contributed equally to this work*

*# To whom correspondence should be addressed:* mohamed.kabbaj@med.fsu.edu  
zwang@psy.fsu.edu

<sup>1</sup>Department of Biomedical Sciences, Florida State University, Tallahassee, FL-32306

<sup>2</sup>Program in Neuroscience, Florida State University, Tallahassee, FL-32306

<sup>3</sup>Department of Psychology, Florida State University, Tallahassee, FL-32306

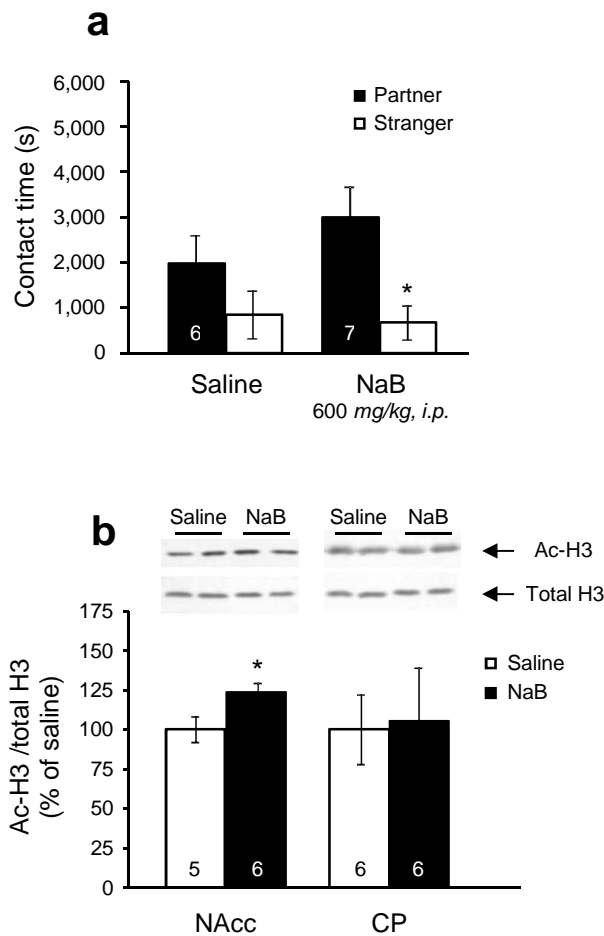

**Supplementary Figure 1. Sodium butyrate (NaB) facilitates partner preference in female prairie voles.** (a) Sexually naïve females received intraperitoneal (*i.p.*) injections of either saline or NaB (600 mg/kg), cohabited with a male for 6 hours without mating, and then tested for partner preference. (a) Similar to TSA, animals injected with NaB exhibited a significant partner preference (two-tailed paired *t*-test:  $t_6 = 2.71$ ,  $P = 0.03$ ), while saline-injected animals did not (two-tailed paired *t*-test:  $t_5 = 1.07$ ,  $P = 0.33$ ). However, NaB treatment had no effect on the locomotion (two-tailed unpaired *t*-test:  $146.5 \pm 19.2$  for saline, and  $147.0 \pm 33.8$  for NaB;  $t_{11} = 0.01$ ,  $P = 0.99$ ). (b) To investigate whether these behavioral effects were associated with an alteration of global histone acetylation, a separate batch of females was injected with saline or NaB (600 mg/kg, *i.p.*), sacrificed 2 hours later, and global histone H3 acetylation (Lys14, H3K14) was assessed by Western-blot in the nucleus accumbens (NAcc) and caudate putamen (CP). NaB-treated animals had a significantly higher level of global histone H3K14 acetylation in the NAcc (two-tailed unpaired *t*-test:  $t_9 = 2.46$ ,  $P = 0.03$ ) but not CP ( $t_{10} = 0.13$ ,  $P = 0.90$ ), as compared to saline-treated controls.

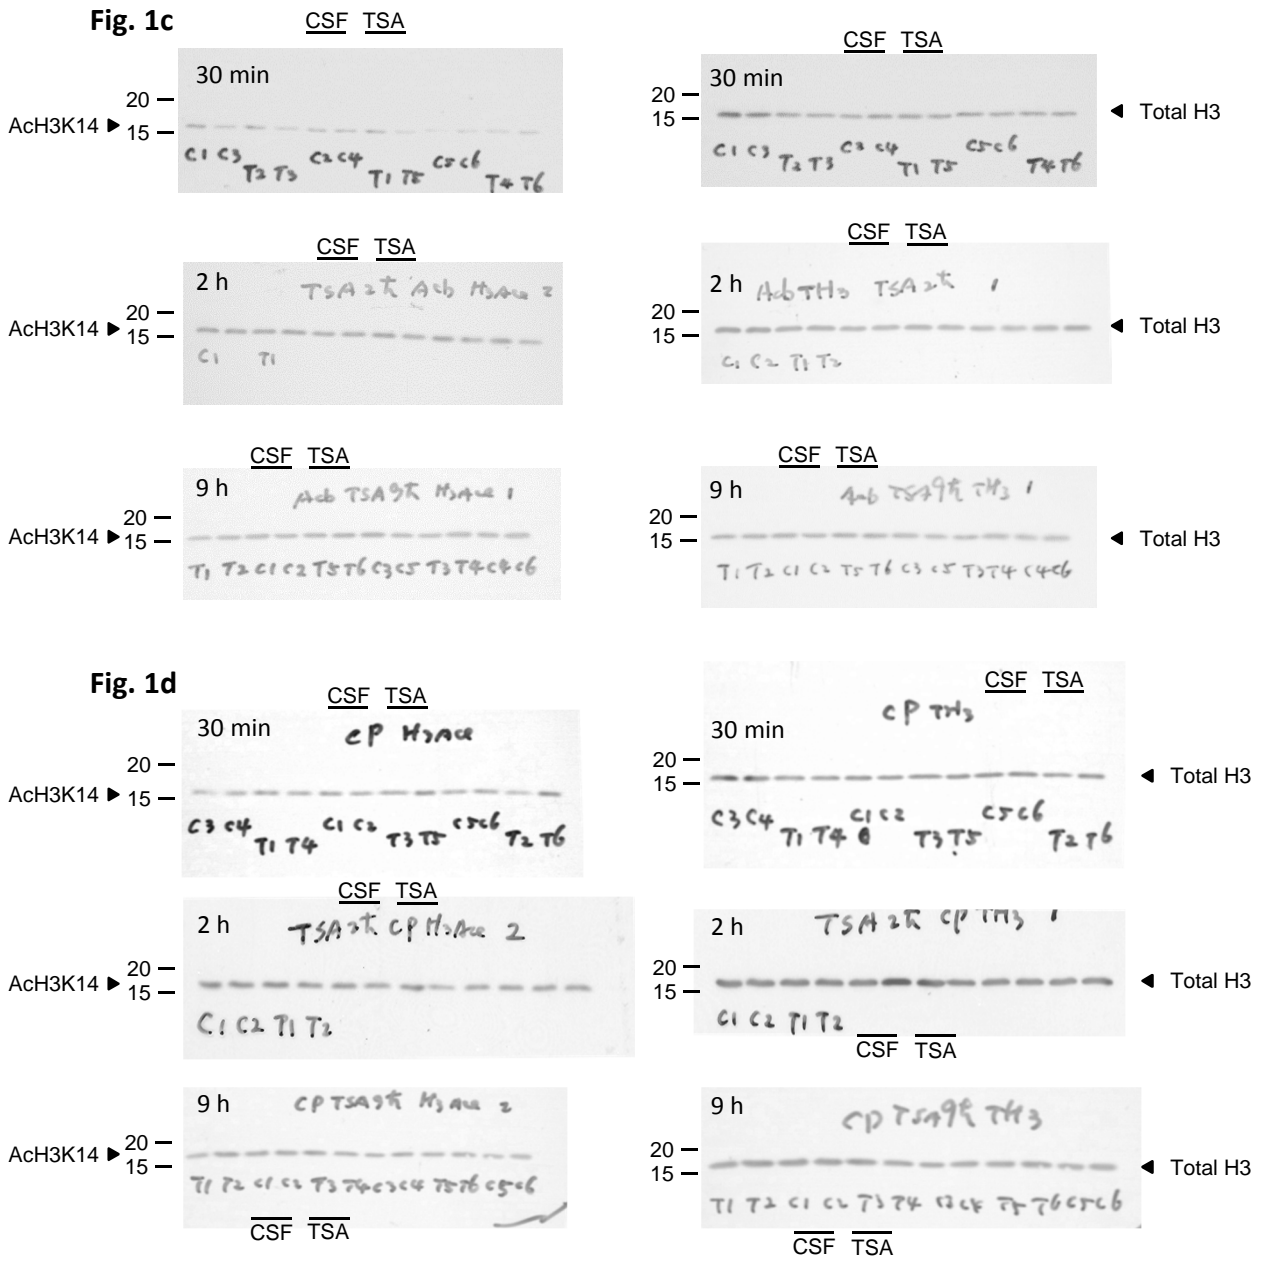

**Supplementary Figure 2. Images of full length blots presented in the main Figure 1.**

**Fig. 2e**

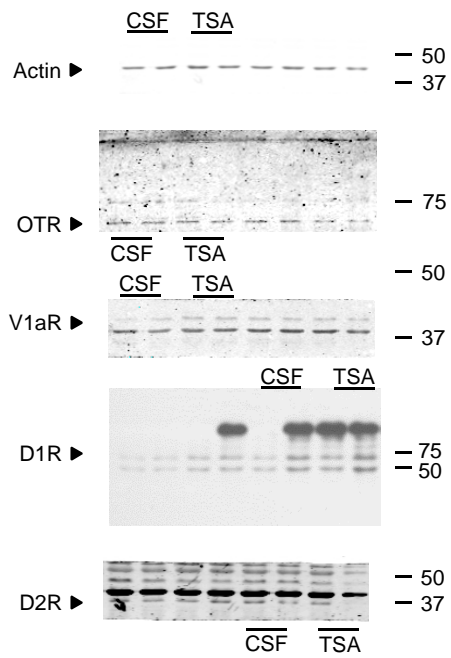

**Fig. 2f**

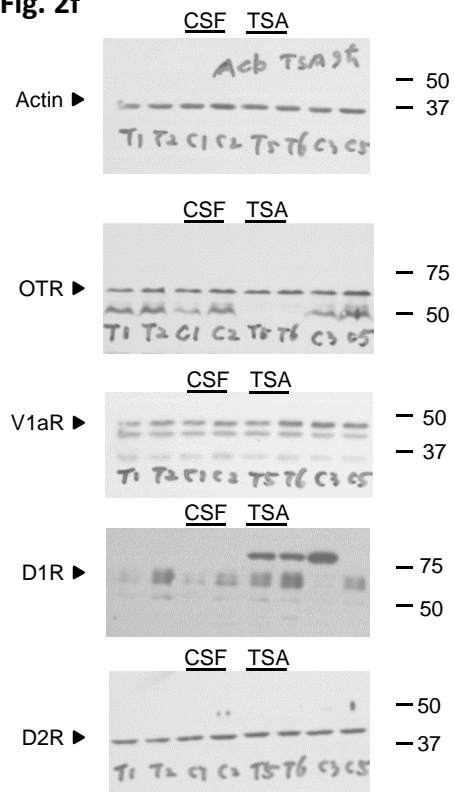

**Fig. 2g**

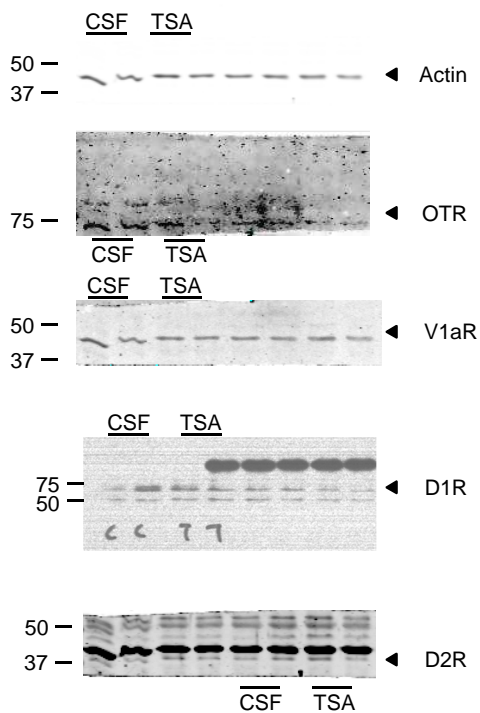

**Fig. 2h**

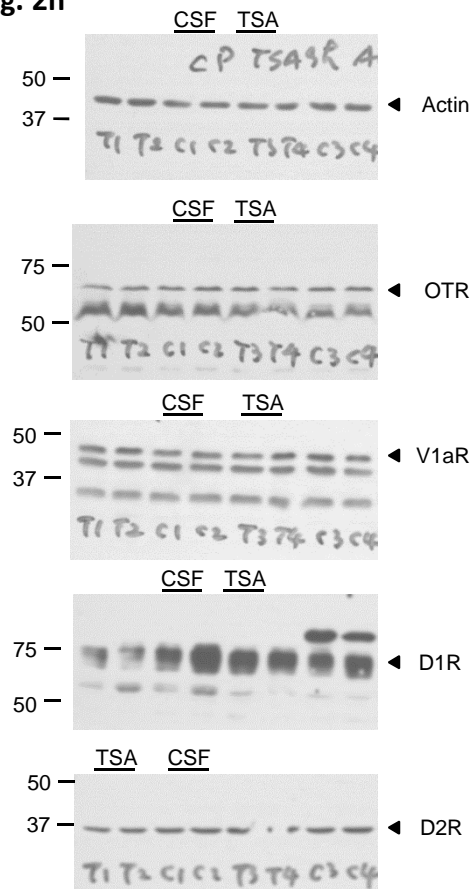

**Supplementary Figure 3. Images of full length blots presented in the main Figure 2.**

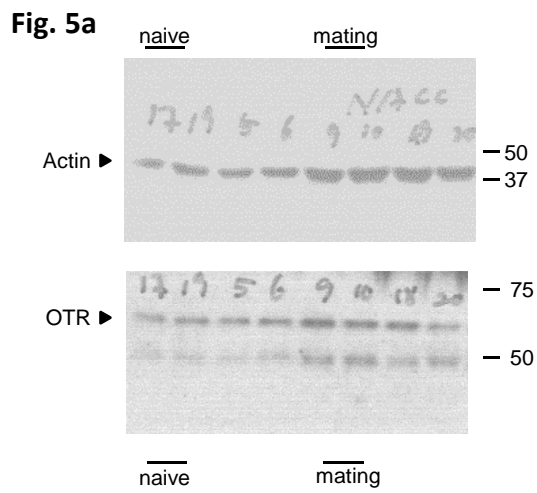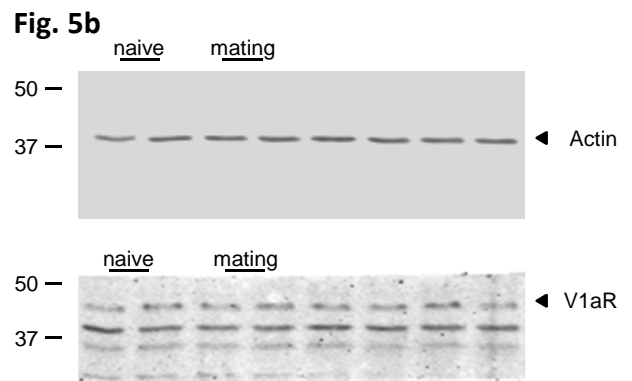

**Supplementary Figure 4. Images of full length blots presented in the main Figure 5.**

**Supplementary Figure 1**

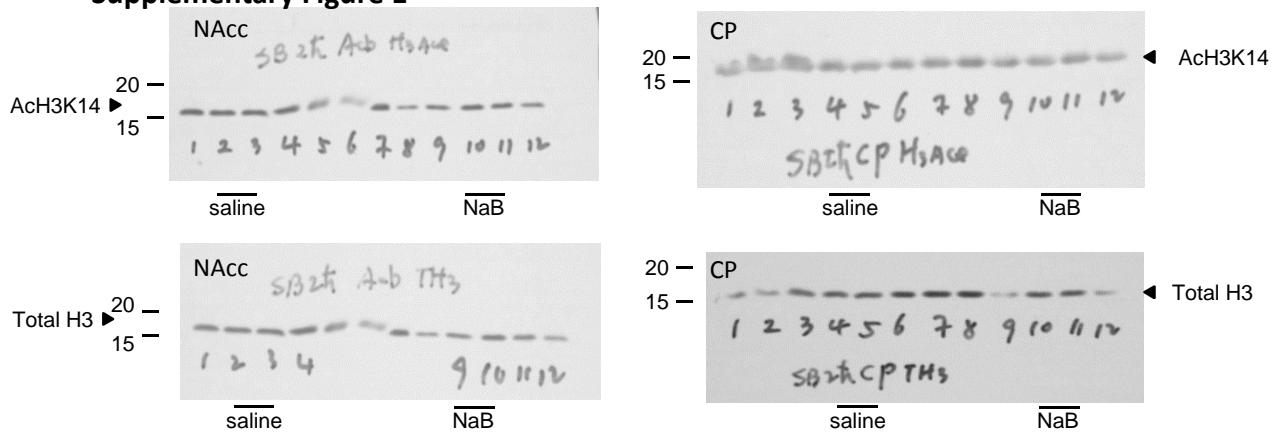

**Supplementary Figure 5. Images of full length blots presented in the Supplementary Figure 1.**
